# Supplementary material
Source: HighWire-hosted journal article supplement (http://erj.ersjournals.com/highwire/filestream/131499/field_highwire_adjunct_files/0/ERJ-00477-2016_Supplement.pdf)
Supplement: ERJ-00477-2016_Supplement.pdf [file ERJ-00477-2016_Supplement.pdf]

## ONLINE DATA SUPPLEMENT

Sarcoidosis incidence and prevalence: a nationwide register-based assessment in Sweden

Elizabeth V. Arkema, Johan Grunewald, Susanna Kullberg, Anders Eklund, Johan Askling

**Table E1.** Medications and anatomical therapeutic chemical (ATC) classification codes used to identify treated sarcoidosis patients.

|                                                     | Name               | Anatomical therapeutic<br>chemical classification code |
|-----------------------------------------------------|--------------------|--------------------------------------------------------|
| <b>Immunomodulating and immunosuppressant drugs</b> |                    |                                                        |
|                                                     | Azathioprine       | L04AX01                                                |
|                                                     | Mycophenolate      | L04AA06                                                |
|                                                     | Cyclophosphamide   | L01AA01                                                |
|                                                     | Methotrexate       | L01BA01, L04AX03                                       |
| <b>Antimalarial drugs</b>                           |                    |                                                        |
|                                                     | Hydroxychloroquine | P01BA02                                                |
| <b>Glucocorticoids</b>                              |                    |                                                        |
|                                                     | Prednisolone       | H02AB06                                                |
|                                                     | Betamethasone      | H02AB01                                                |
|                                                     | Methylprednisolone | H02AB04                                                |
|                                                     | Prednisone         | H02AB07                                                |

**Table E2.** Description of clinical cases from Karolinska Hospital's Sarcoidosis Clinical Register living in Sweden in 2013 (N=1070)

|                                                  | Clinical Cohort | At least 1 visit<br>in patient register | At least 2 visits<br>in patient register | At least 2 visits in patient<br>register and history of<br>medication dispensing * |
|--------------------------------------------------|-----------------|-----------------------------------------|------------------------------------------|------------------------------------------------------------------------------------|
| <b>No. (% of total)</b>                          | 1070 (100)      | 1022 (96)                               | 1013 (95)                                | 845 (79)                                                                           |
| <b>Male, %</b>                                   | 59.0            | 59.2                                    | 59.0                                     | 58.1                                                                               |
| <b>Mean age in 2013 <math>\pm</math> SD, yrs</b> | 51.2 $\pm$ 12.2 | 51.3 $\pm$ 12.2                         | 51.3 $\pm$ 12.2                          | 51.5 $\pm$ 12.3                                                                    |

SD standard deviation

\*Medication dispensing data available from July 2005 through December 2013
